# Supplementary material
Source: MDPI journal article supplement (https://www.mdpi.com/2073-4433/13/7/1114)
Supplement: s1 [file s1]

# Determinant Indicators for Assessing the Adaptive Capacity of Agricultural Producers to Climate Change

María de Lourdes Maldonado-Méndez, José Luis Romo-Lozano and Alejandro Ismael Monterroso-Rivas

**Table S1.** Agricultural producers types identified by the authors.

| TYPE | NOMENCLATURE                                                                                                                                           |
|------|--------------------------------------------------------------------------------------------------------------------------------------------------------|
| T1   | Family subsistence producer with very high sensitivity and medium level of exposure to climate change                                                  |
| T2   | Family subsistence producer with very high sensitivity and low level of exposure to climate change                                                     |
| T3   | Family subsistence producer with very high sensitivity and very low level of exposure to climate change                                                |
| T4   | Family subsistence producer with high sensitivity and low-to-medium level of exposure to climate change                                                |
| T5   | Family subsistence producer with minimal conditions for diversification, high sensitivity, and very low–medium level of exposure to climate change     |
| T6   | Family subsistence producer with minimal conditions for diversification, medium–high sensitivity, and very low–low level of exposure to climate change |
| T7   | Family producer with agricultural income, medium–high sensitivity, and very low–medium level of exposure to climate change                             |
| T8   | Family producer with agricultural income, medium sensitivity, and very low–medium level of exposure to climate change                                  |
| T9   | Family producer with agricultural income, low–medium sensitivity, and very low–medium level of exposure to climate change                              |
| T10  | Producer in transition with medium–high sensitivity, and low–medium level of exposure to climate change                                                |
| T11  | Producer in transition with low–medium sensitivity, and low–medium level of exposure to climate change                                                 |
| T12  | Entrepreneurial producer with low profitability, low–medium sensitivity and low–medium level of exposure to climate change                             |
| T13  | Entrepreneurial producer with low–medium sensitivity and low–medium level of exposure to climate change                                                |
| T14  | Entrepreneurial producer with low sensitivity and very low–medium level of exposure to climate change                                                  |
| T15  | Entrepreneurial producer with very low–low sensitivity and very low–medium level of exposure to climate change                                         |
| T16  | Entrepreneurial producer with minimal-low sensitivity and very low–low level of exposure to climate change                                             |
| T17  | Entrepreneurial producer with very low sensitivity and low level of exposure to climate change                                                         |
| T18  | Entrepreneurial producer with minimal sensitivity and very low–low level of exposure to climate change                                                 |
| T19  | Entrepreneurial producer with minimal sensitivity and low–medium level of exposure to climate change                                                   |

Source: Prepared by the authors

**Table S2.** Synthesis of the studies selected and analyzed for assessing the capacity to adapt to climate change.

| Author                               | Method                                                                                                                                                                                                     | Level/Sector                                                                                                                       | Dimensions                                                                                          | Indicators                                                                                                                                                                                                                                                                                                                                                                                                                                                                                                                                                                                                                                                                                                                                     | Synthesis                                                                                       |
|--------------------------------------|------------------------------------------------------------------------------------------------------------------------------------------------------------------------------------------------------------|------------------------------------------------------------------------------------------------------------------------------------|-----------------------------------------------------------------------------------------------------|------------------------------------------------------------------------------------------------------------------------------------------------------------------------------------------------------------------------------------------------------------------------------------------------------------------------------------------------------------------------------------------------------------------------------------------------------------------------------------------------------------------------------------------------------------------------------------------------------------------------------------------------------------------------------------------------------------------------------------------------|-------------------------------------------------------------------------------------------------|
| <b>Juhola, S. and Kruse S., 2013</b> | An aggregate index was designed from a set of variables and a weighted average was calculated at the dimension level. The Delphi method is used, and it is qualified using government data and statistics. | Pan-European assessment of adaptive capacity and an assessment of the adaptive capacity of the tourism sector in the European Alps | Knowledge and awareness<br>Technology<br>Infrastructure<br>Institutions<br>Economics resources      | CC1. Educational commitment<br>CC2. Computer skills<br>CC3. Attitudes towards climate change<br>T1. Resources for technology<br>T2. Capacity to undertake research<br>T3. Patents<br>I1. Transport<br>I2. Water infrastructure<br>I3. Health<br>In 1. Government effectiveness<br>In 2. National adaptation strategies<br>In 3. Democracy<br>RE. Income per capita<br>RE. Age dependence<br>RE. Unemployment                                                                                                                                                                                                                                                                                                                                   | 5 dimensions<br>15 indicators<br>Source: Prepared by the authors based on Greiving et al., 2011 |
|                                      |                                                                                                                                                                                                            |                                                                                                                                    |                                                                                                     | HR1. Farming experience<br>HR2. Educational attainment of household head<br>HR3. Percentage of adults with primary education<br>HR4. Percentage of adults in the household<br>PhR1. Farm size<br>PhR2. Irrigation<br>PhR3. Ownership of farm implements/machines<br>PhR4. Farm tenure<br>RFi1. Remittances from family members<br>RFi2. Value of animal units<br>RFi3. Receives financial assistance/subsidy from the government<br>RFi4. Has access to credit<br>I1. Type of trainings on farming<br>I2. Receives technical assistance<br>I3. Participates in farm organization<br>I4. Sources of climate information<br>Ld1. Number of livelihoods/sources of income<br>Ld2. Percentage of land not in crops<br>Ld3. Number of crops planted |                                                                                                 |
| <b>Defiesta and Rapera, 2014</b>     | Through a process of analytical hierarchy and expert judgment, the indicators were weighted.                                                                                                               | Agricultural sector                                                                                                                | Human Resources<br>Physical resources<br>Financial resources<br>Information<br>Livelihood diversity |                                                                                                                                                                                                                                                                                                                                                                                                                                                                                                                                                                                                                                                                                                                                                | 5 dimensions<br>19 indicators<br>Source: Prepared by the authors                                |

| Author              | Method                                                                                                                                                                                                                                                                                                                                                                                                                                                                                                      | Level/Sector                            | Dimensions                                     | Indicators                                                                                                                                          | Synthesis                                                                                                              |
|---------------------|-------------------------------------------------------------------------------------------------------------------------------------------------------------------------------------------------------------------------------------------------------------------------------------------------------------------------------------------------------------------------------------------------------------------------------------------------------------------------------------------------------------|-----------------------------------------|------------------------------------------------|-----------------------------------------------------------------------------------------------------------------------------------------------------|------------------------------------------------------------------------------------------------------------------------|
| Lam et al.,<br>2014 | A vulnerability index was designed by combining the different variables representing the three dimensions using an arbitrary weighting scheme. To validate the derived vulnerability index, a regression analysis was performed between the actual damage data (dependent variable) and the predictor variables representing the three dimensions of vulnerability. The weights were revised according to the resultant regression coefficients, and the vulnerability index was recalculated and compared. | Coastal hazards in the Caribbean Region | Socioeconomics<br>Technology<br>Infrastructure | S1. Human Development Index<br>S2. Property incidence<br>S3. Income inequality<br>T1. Electricity coverage<br>I1. Road density<br>I2. Communication | 3 dimensions<br>6 indicators<br>Source: Prepared by the authors based on Yusuf y Francisco, 2009; Brito y Arenas, 2009 |

|                  |                                                                                                                                                                                                  |                                                                                                                               |                                                                                    |                                                                                      |                                                                                                 |
|------------------|--------------------------------------------------------------------------------------------------------------------------------------------------------------------------------------------------|-------------------------------------------------------------------------------------------------------------------------------|------------------------------------------------------------------------------------|--------------------------------------------------------------------------------------|-------------------------------------------------------------------------------------------------|
| <b>Chen 2014</b> | Descriptive data analysis was performed for all indicators. Correlation analysis and cluster analysis were used to determine the relationships between the different components of the AC index. | China's adaptive capacity to climatic variability and climate-related disasters, both at a national level and in a regionally | Natural capital engineering capital financial capital human capital social capital | CN1. Per capita freshwater resources availability                                    | 5 dimensions<br>46 indicators<br>Source: Prepared by the authors based on Graedel et al. (2012) |
|                  |                                                                                                                                                                                                  |                                                                                                                               |                                                                                    | CN2. Percentage of natural wetland coverage                                          |                                                                                                 |
|                  |                                                                                                                                                                                                  |                                                                                                                               |                                                                                    | CN3. Percentage of forest land                                                       |                                                                                                 |
|                  |                                                                                                                                                                                                  |                                                                                                                               |                                                                                    | CN4. Percentage of green space in urban area                                         |                                                                                                 |
|                  |                                                                                                                                                                                                  |                                                                                                                               |                                                                                    | CN5. Percentage of nature reserves                                                   |                                                                                                 |
|                  |                                                                                                                                                                                                  |                                                                                                                               |                                                                                    | CN6. Per capita arable land area                                                     |                                                                                                 |
|                  |                                                                                                                                                                                                  |                                                                                                                               |                                                                                    | CI1. Coverage of water supply in urban areas                                         |                                                                                                 |
|                  |                                                                                                                                                                                                  |                                                                                                                               |                                                                                    | CI2. Percentage of population with improved sources of drinking water in rural areas |                                                                                                 |
|                  |                                                                                                                                                                                                  |                                                                                                                               |                                                                                    | CI3. Wastewater treatment rate in urban areas                                        |                                                                                                 |
|                  |                                                                                                                                                                                                  |                                                                                                                               |                                                                                    | CI4. Percentage of population with improved sanitation in rural areas                |                                                                                                 |
|                  |                                                                                                                                                                                                  |                                                                                                                               |                                                                                    | IC5. Percentage of areas with drainage capacity in rural areas                       |                                                                                                 |
|                  |                                                                                                                                                                                                  |                                                                                                                               |                                                                                    | CI6. Ratio of reservoir capacity to renewable surface water resources                |                                                                                                 |
|                  |                                                                                                                                                                                                  |                                                                                                                               |                                                                                    | CI7. Percentage of population with flood protection in rural areas                   |                                                                                                 |
|                  |                                                                                                                                                                                                  |                                                                                                                               |                                                                                    | IC8. Percent flood protection against a 50-year flood                                |                                                                                                 |
|                  |                                                                                                                                                                                                  |                                                                                                                               |                                                                                    | CI9. Percentage of heating coverage                                                  |                                                                                                 |
|                  |                                                                                                                                                                                                  |                                                                                                                               |                                                                                    | IC10. Percentage of population having access to gas                                  |                                                                                                 |
|                  |                                                                                                                                                                                                  |                                                                                                                               |                                                                                    | IC11. Road network density                                                           |                                                                                                 |
|                  |                                                                                                                                                                                                  |                                                                                                                               |                                                                                    | IC12. Per capita public transport capacity                                           |                                                                                                 |
|                  |                                                                                                                                                                                                  |                                                                                                                               |                                                                                    | IC13. Transportation facility indicator                                              |                                                                                                 |
|                  |                                                                                                                                                                                                  |                                                                                                                               |                                                                                    | IC14. Number of agricultural machinery per arable land area                          |                                                                                                 |
|                  |                                                                                                                                                                                                  |                                                                                                                               |                                                                                    | IC15. Irrigation capacity per arable land area                                       |                                                                                                 |
|                  |                                                                                                                                                                                                  |                                                                                                                               |                                                                                    | CF1. Per capita gross domestic production (GDP)                                      |                                                                                                 |
|                  |                                                                                                                                                                                                  |                                                                                                                               |                                                                                    | CF2. GDP growth rate                                                                 |                                                                                                 |
|                  |                                                                                                                                                                                                  |                                                                                                                               |                                                                                    | CF3. Per capita public revenue                                                       |                                                                                                 |
|                  |                                                                                                                                                                                                  |                                                                                                                               |                                                                                    | CF4. Per capita public expenditure                                                   |                                                                                                 |
|                  |                                                                                                                                                                                                  |                                                                                                                               |                                                                                    | CH1. Life expectancy at birth                                                        |                                                                                                 |
|                  |                                                                                                                                                                                                  |                                                                                                                               |                                                                                    | CH2. Social dependency ratio                                                         |                                                                                                 |
|                  |                                                                                                                                                                                                  |                                                                                                                               |                                                                                    | CH3. Natural population growth rate                                                  |                                                                                                 |
|                  |                                                                                                                                                                                                  |                                                                                                                               |                                                                                    | CH4. Literacy rate                                                                   |                                                                                                 |
|                  |                                                                                                                                                                                                  |                                                                                                                               |                                                                                    | CH5. Average years of education                                                      |                                                                                                 |
|                  |                                                                                                                                                                                                  |                                                                                                                               |                                                                                    | CH6. Percentage of population with higher education                                  |                                                                                                 |
|                  |                                                                                                                                                                                                  |                                                                                                                               |                                                                                    | CH7. Annual number of patents per 1,000 persons                                      |                                                                                                 |

| Author                   | Method                                                                                | Level/Sector                                                                                | Dimensions                                              | Indicators                                                                                                                                  | Synthesis                                                                                    |
|--------------------------|---------------------------------------------------------------------------------------|---------------------------------------------------------------------------------------------|---------------------------------------------------------|---------------------------------------------------------------------------------------------------------------------------------------------|----------------------------------------------------------------------------------------------|
| Ruiz Meza<br>L. E., 2015 | Participatory methodology: interviews and participatory research workshops were used. | Adaptive capacity of small-scale coffee farmers to climate change impacts (Chiapas, Mexico) | Access to resources<br><br>Flexibility<br><br>Stability | CH8. Percentage of public expenditure on research and development (R&D) in GDP                                                              | 3 dimensions<br>18 indicators<br>Source: Prepared by the authors based on Wehbe et al., 2005 |
|                          |                                                                                       |                                                                                             |                                                         | CH9. Climate Observation capacity index                                                                                                     |                                                                                              |
|                          |                                                                                       |                                                                                             |                                                         | CS1. Percentage of population in poverty                                                                                                    |                                                                                              |
|                          |                                                                                       |                                                                                             |                                                         | CS2. Unemployment rate                                                                                                                      |                                                                                              |
|                          |                                                                                       |                                                                                             |                                                         | CS3. Inflation rate                                                                                                                         |                                                                                              |
|                          |                                                                                       |                                                                                             |                                                         | CS4. Number of doctors per 1,000 persons                                                                                                    |                                                                                              |
|                          |                                                                                       |                                                                                             |                                                         | CS5. Number of hospital beds per 1,000 persons                                                                                              |                                                                                              |
|                          |                                                                                       |                                                                                             |                                                         | CS6. Per capita medical aid expenditure                                                                                                     |                                                                                              |
|                          |                                                                                       |                                                                                             |                                                         | CS7. Number of refrigerators per household                                                                                                  |                                                                                              |
|                          |                                                                                       |                                                                                             |                                                         | CS8. Number of air conditioners per household                                                                                               |                                                                                              |
|                          |                                                                                       |                                                                                             |                                                         | CS9. Number of televisions per household                                                                                                    |                                                                                              |
|                          |                                                                                       |                                                                                             |                                                         | CS10. Number of telephones per household                                                                                                    |                                                                                              |
|                          |                                                                                       |                                                                                             |                                                         | CS11. Coverage of basic health insurance in urban areas                                                                                     |                                                                                              |
|                          |                                                                                       |                                                                                             |                                                         | CS12. Coverage of basic health insurance in rural areas                                                                                     |                                                                                              |
|                          |                                                                                       |                                                                                             |                                                         | A1. Natural resources (water and soil)                                                                                                      |                                                                                              |
|                          |                                                                                       |                                                                                             |                                                         | A2. Physical resources (infrastructure)                                                                                                     |                                                                                              |
|                          |                                                                                       |                                                                                             |                                                         | A3. Financial resources,                                                                                                                    |                                                                                              |
|                          |                                                                                       |                                                                                             |                                                         | A4. Human Resources                                                                                                                         |                                                                                              |
|                          |                                                                                       |                                                                                             |                                                         | A5. Social resources                                                                                                                        |                                                                                              |
|                          |                                                                                       |                                                                                             |                                                         | A6. Political resources                                                                                                                     |                                                                                              |
|                          |                                                                                       |                                                                                             |                                                         | A7. Public subsidies                                                                                                                        |                                                                                              |
|                          |                                                                                       |                                                                                             |                                                         | A8. Social assistance in emergencies                                                                                                        |                                                                                              |
|                          |                                                                                       |                                                                                             |                                                         | A9. Technology options for adaptation                                                                                                       |                                                                                              |
|                          |                                                                                       |                                                                                             |                                                         | A10. Families with technology transfer and technical assistance                                                                             |                                                                                              |
|                          |                                                                                       |                                                                                             |                                                         | F1. Diversity of coffee varieties used                                                                                                      |                                                                                              |
|                          |                                                                                       |                                                                                             |                                                         | F2. Number of crops grown                                                                                                                   |                                                                                              |
|                          |                                                                                       |                                                                                             |                                                         | F3. Production for subsistence and commercialization                                                                                        |                                                                                              |
|                          |                                                                                       |                                                                                             |                                                         | F4. Diversity of income sources: agriculture, trade, non-agricultural salaries, remittance, income according to activity and family member. |                                                                                              |
|                          |                                                                                       |                                                                                             |                                                         | E1. Variability of product prices                                                                                                           |                                                                                              |
|                          |                                                                                       |                                                                                             |                                                         | E2. Agricultural impacts and losses                                                                                                         |                                                                                              |
|                          |                                                                                       |                                                                                             |                                                         | E3. Erosion, landslides, and flooding                                                                                                       |                                                                                              |
|                          |                                                                                       |                                                                                             |                                                         | E4. Migration                                                                                                                               |                                                                                              |

| Author                     | Method                                                                                                                                                                                                                         | Level/Sector                                                                         | Dimensions                                          | Indicators                                                                                                                                                                                 | Synthesis                                                                                    |
|----------------------------|--------------------------------------------------------------------------------------------------------------------------------------------------------------------------------------------------------------------------------|--------------------------------------------------------------------------------------|-----------------------------------------------------|--------------------------------------------------------------------------------------------------------------------------------------------------------------------------------------------|----------------------------------------------------------------------------------------------|
| Lockwood<br>2015           | They developed psychometric scales for these dimensions and tested their internal consistency (reliability) and validity (how well the measures define the construct) using factor analysis.                                   | Agricultural landscape in Australia                                                  | Social capital                                      | SC1. Local networks<br>SC2. Trust<br>SC3. Reciprocity                                                                                                                                      | 4 dimensions<br>14 indicators<br>Source: Prepared by the authors                             |
|                            |                                                                                                                                                                                                                                |                                                                                      | Human, financial and physical capital               | HFC1. Knowledge and information<br>HFC2. Labor and time<br>HFC3. Finance and infrastructure                                                                                                |                                                                                              |
|                            |                                                                                                                                                                                                                                |                                                                                      | Management approach                                 | MA1. Innovation<br>MA2. Adaptive management<br>MA3. Risk behavior                                                                                                                          |                                                                                              |
|                            |                                                                                                                                                                                                                                |                                                                                      | Governance                                          | G1. Legitimacy<br>G2. Accountability<br>G3. Inclusion and fairness<br>G4. Leadership                                                                                                       |                                                                                              |
|                            |                                                                                                                                                                                                                                |                                                                                      |                                                     | G5. Coordination and collaboration                                                                                                                                                         |                                                                                              |
| Nhuan,<br>2016             | They developed a survey based on the indicators approach to assess AC. Household survey data were processed using descriptive statistical methods, principal component analysis (PCA) and multiple linear regression analysis. | The adaptive capacity of urban households: The case of Da Nang city, Central Vietnam | Household economy                                   | HE1. Wealth<br>HE2. Housing conditions<br>HE3. Durable assets                                                                                                                              | 6 dimensions<br>17 indicators<br>Source: Prepared by the authors                             |
|                            |                                                                                                                                                                                                                                |                                                                                      | Social relation                                     | SR1. knowledge sharing<br>SR2. Social Organizations<br>SR3. Social support networks                                                                                                        |                                                                                              |
|                            |                                                                                                                                                                                                                                |                                                                                      | Human capital                                       | HC1. Education<br>HC2. Knowledge<br>HC3. Employment                                                                                                                                        |                                                                                              |
|                            |                                                                                                                                                                                                                                |                                                                                      | Adaptation practices                                | AP1. Disaster Preparedness Measures<br>AP2. Skills and experiences for disasters and CC                                                                                                    |                                                                                              |
|                            |                                                                                                                                                                                                                                |                                                                                      | Municipal services and urban governance             | AP3. Access to water sources during disasters                                                                                                                                              |                                                                                              |
| Araya-Muñoz et al,<br>2016 | They created a general framework of indicators, standardized and aggregated using fuzzy logic, and performed a sensitivity, uncertainty, and correlation analysis to assess robustness, using fuzzy overlay in ArcGIS 10.      | Assessing urban adaptive capacity to climate change (Chile)                          | Livelihood protection                               | MSyG1. Health services<br>MSyG2. Electricity supply<br>MSyG3. Urban stability and security                                                                                                 | 6 dimensions<br>17 indicators<br>Source: Prepared by the authors based on Acosta et al, 2013 |
|                            |                                                                                                                                                                                                                                |                                                                                      | Knowledge and Equity                                | LP1. Livelihood diversity<br>LP2. Insurance coverage                                                                                                                                       |                                                                                              |
|                            |                                                                                                                                                                                                                                |                                                                                      | Technology, infrastructure and human health         | KaE1. Female activity rate<br>KaE2. income inequality<br>KaE3. Alphabetization rate<br>KaE4. Tertiary qualification                                                                        |                                                                                              |
|                            |                                                                                                                                                                                                                                |                                                                                      | Economic resources, institutions and social capital | T1. Capacity to undertake research<br>T2. Patents<br>T3. Distance to hospital<br>T4. Hospital beds<br>T5. Physician<br>T6. Transport                                                       |                                                                                              |
|                            |                                                                                                                                                                                                                                |                                                                                      |                                                     | T7. Physical housing conditions<br>T8. informal networks<br>ERIS1. Income per capita<br>ERIS2. Poverty<br>ERIS3. Dependency ratio<br>ERIS4. Municipal budget<br>ERIS5. Master plan updates |                                                                                              |

| Author                                           | Method                                                                                                                                                                                                                                                                      | Level/Sector                                                                                             | Dimensions                                                                                                     | Indicators                                                                                                                                                                                                                                                                                                                                                                                                                                                                                          | Synthesis                                                                                                              |
|--------------------------------------------------|-----------------------------------------------------------------------------------------------------------------------------------------------------------------------------------------------------------------------------------------------------------------------------|----------------------------------------------------------------------------------------------------------|----------------------------------------------------------------------------------------------------------------|-----------------------------------------------------------------------------------------------------------------------------------------------------------------------------------------------------------------------------------------------------------------------------------------------------------------------------------------------------------------------------------------------------------------------------------------------------------------------------------------------------|------------------------------------------------------------------------------------------------------------------------|
| <b>Abdul-Razak Majeed and Kruse Sylvia, 2017</b> | Validation of determinants and indicators through interviews with experts.                                                                                                                                                                                                  | Adaptive capacity to climate change of smallholder farmers (Northern Region of Ghana)                    | Economic resources<br>Social capital<br>Awareness and training<br>Technology<br>Infrastructure<br>Institutions | ER1. Diversity of source of income<br>ER2. Remittance<br>ER3. Access to credit<br>SC1. Access to family / household labour<br>SC2. Participation in farmer-based organizations<br>SC3. Participation in gender-based organizations<br>SC4. Participation in religious-type organizations<br>SC5. Participation in other organization                                                                                                                                                                | 6 dimensions<br>22 indicators<br>Source: Prepared by the authors based on 22 authors                                   |
|                                                  | Ranking for each determinant and indicator was determined by the average of the ranking scores assigned to each one by all the experts.                                                                                                                                     |                                                                                                          |                                                                                                                | AT1. Acceptance of climate change<br>AT2. Level of literacy<br>AT3. Access to climate information<br>AT4. Farming experience<br>AT5. Access to extension service<br>T1. Knowledge of seed varieties<br>T2. Knowledge of soil moisture retention techniques<br>T3. Knowledge of soil fertility retention techniques<br>I1. Landholding size<br>I2. Irrigation infrastructure<br>I3. Access to roads<br>In 1. Land tenure arrangement<br>In 2. Government subsidy<br>In 3. Disaster Relief assistance |                                                                                                                        |
| <b>Li Mengping et al., 2017</b>                  | Pearson's correlation analysis to test the complementarity and substitution between indicators. Standardized regression coefficient and factor analysis to integrate complementary capital indicators, and a contribution rate of each factor was used to calculate the AC. | Adaptive capacity of apple farmers to drought events by impact of climate change (Loess Plateau, China). | Experience<br>Infrastructure<br>Material resources<br>Technology<br>Flexibility<br>Economic resources          | E1. Age<br>E2. Farming years<br>I1. Distance to agricultural fairs<br>I2. Distance to markets<br>RM1. Cultivated land area<br>RM2. Housing type<br>T1. Training<br>T2. Village cadres<br>F1. Household size<br>F2. Non-agricultural income<br>RE1. Number of relatives<br>RE2. Agricultural income<br>RE3. Current value of the house                                                                                                                                                               | 6 dimensions<br>13 indicators<br>Source: Prepared by the authors based on Bryan et al., 2015; Huai, 2016a; Sharp, 2003 |

| Author                                     | Method                                                                                                                                                                                                                                                 | Level/Sector                                                                       | Dimensions                                                              | Indicators                                                              | Synthesis                                                        |
|--------------------------------------------|--------------------------------------------------------------------------------------------------------------------------------------------------------------------------------------------------------------------------------------------------------|------------------------------------------------------------------------------------|-------------------------------------------------------------------------|-------------------------------------------------------------------------|------------------------------------------------------------------|
| <b>Monterroso R. A. and Conde C., 2017</b> | Standardization and normalization of the variables of each indicator. An AC index was estimated for each municipality and the final range of values was divided into five groups according to the geometric distribution of the frequencies of values. | Assesses the adaptive capacity of Mexican municipalities to address climate change | Human capital<br>Social capital<br>Financial capital<br>Natural capital | HC1. Population aged 15 years and older who can read (%)                | 4 dimensions<br>19 indicators<br>Source: Prepared by the authors |
|                                            |                                                                                                                                                                                                                                                        |                                                                                    |                                                                         | HC2. School attendance by people from 6 to 24 years of age (%)          |                                                                  |
|                                            |                                                                                                                                                                                                                                                        |                                                                                    |                                                                         | HC3. Literacy rate at municipality                                      |                                                                  |
|                                            |                                                                                                                                                                                                                                                        |                                                                                    |                                                                         | HC4. Change in the municipality's population 2005–2030 (%)              |                                                                  |
|                                            |                                                                                                                                                                                                                                                        |                                                                                    |                                                                         | SC1. Production units organized to access some support (%)              |                                                                  |
|                                            |                                                                                                                                                                                                                                                        |                                                                                    |                                                                         | SC2. No litigation or disputes over land in Production units (%)        |                                                                  |
|                                            |                                                                                                                                                                                                                                                        |                                                                                    |                                                                         | SC3. Production units with technical training (%)                       |                                                                  |
|                                            |                                                                                                                                                                                                                                                        |                                                                                    |                                                                         | SC4. Possession or land tenure (%)                                      |                                                                  |
|                                            |                                                                                                                                                                                                                                                        |                                                                                    |                                                                         | SC5. Civil protection office (0=no, 1=yes)                              |                                                                  |
|                                            |                                                                                                                                                                                                                                                        |                                                                                    |                                                                         | SC6. Map of natural hazards (0=no, 1=yes)                               |                                                                  |
|                                            |                                                                                                                                                                                                                                                        |                                                                                    |                                                                         | FC1. Production units without difficulty accessing credit (%)           |                                                                  |
|                                            |                                                                                                                                                                                                                                                        |                                                                                    |                                                                         | FC2. Production units that receive remittances from abroad (%)          |                                                                  |
|                                            |                                                                                                                                                                                                                                                        |                                                                                    |                                                                         | FC3. Production units reporting some type of savings (%)                |                                                                  |
|                                            |                                                                                                                                                                                                                                                        |                                                                                    |                                                                         | FC4. Production units with credit and insurance coverage (%)            |                                                                  |
|                                            |                                                                                                                                                                                                                                                        |                                                                                    |                                                                         | FC5. Gross domestic product in 2000 (×1000 US\$)                        |                                                                  |
|                                            |                                                                                                                                                                                                                                                        |                                                                                    |                                                                         | FC6. Population with income greater than two times the minimum wage (%) |                                                                  |
|                                            |                                                                                                                                                                                                                                                        |                                                                                    |                                                                         | NC1. Surface with forests and/or rainforests (ha)                       |                                                                  |
|                                            |                                                                                                                                                                                                                                                        |                                                                                    |                                                                         | NC2. Reforested surface in the municipality (ha)                        |                                                                  |
|                                            |                                                                                                                                                                                                                                                        |                                                                                    |                                                                         | NC3. Rate of water extraction from aquifers                             |                                                                  |



| Author        | Method                                                                                                                                                                                                                                                       | Level/Sector                                                                                                                             | Dimensions                                                                             | Indicators                                                                                                                                                                                                                                                                                                                                                                                                                                                                                                                                                      | Synthesis                                                                                                |
|---------------|--------------------------------------------------------------------------------------------------------------------------------------------------------------------------------------------------------------------------------------------------------------|------------------------------------------------------------------------------------------------------------------------------------------|----------------------------------------------------------------------------------------|-----------------------------------------------------------------------------------------------------------------------------------------------------------------------------------------------------------------------------------------------------------------------------------------------------------------------------------------------------------------------------------------------------------------------------------------------------------------------------------------------------------------------------------------------------------------|----------------------------------------------------------------------------------------------------------|
| Holland, 2017 | An AC index was created, the variables were selected through interviews with 109 experts and 3 indicator validation workshops were held.                                                                                                                     | Mapping adaptive capacity and smallholder agriculture (Central America)                                                                  | Financial assets<br>Social assets<br>Physical assets<br>Human assets<br>Natural assets | FA1. Investments to improve crop production: fertilizers, pesticides, soil preparation / tilling and Irrigation (high input)<br>FA2. Access to credits<br>FA3. Access to subsidies<br>FA4. Diverse income sources<br>FA5. Receive remittances<br>AS1. Migration<br>AS2. Receive assistance after extreme events                                                                                                                                                                                                                                                 | 5 dimensions                                                                                             |
|               |                                                                                                                                                                                                                                                              |                                                                                                                                          |                                                                                        | FiA1. Mitigation of crop damage: chemical control of pests and disease and/or integrated pest management (IPM)<br>FiA2. Access to market or small grocery store for sale<br>FiA3. Access to storage of crop product<br>FiA4. Access to transportation to market<br>FiA5. Access to agricultural machinery/equipment<br>HA1. Access to human labor<br>NA1. Implementats soil conservation practices.                                                                                                                                                             | 14 indicators<br>Source: Prepared by the authors                                                         |
| Hoan N., 2019 | Qualitative methods: it was based on rating motivation and abilities (MOTA). An AC index was designed based on farmers' motivation and abilities and semi-structured interviews were conducted to assess the perception, motivation and capacity of farmers. | Assessing the adaptive capacity of farmers under the impact of saltwater intrusion by effect to climate change (Vietnamese Mekong Delta) | Financial ability<br>Technical ability<br>Institutional ability                        | HF1. Budgets: average monthly income and loan for production<br>HF2. Production resources: water quantity and quality and amount of selective seeding<br>HT1. Infrastructure and technique: possession of equipment and tools for production, machinery, roads, Irrigation<br>HT2. Knowledge and skills: educational level, farming experience, rate of participation in trainings<br>HI1. Social organization: rate of participation in agricultural and non-agricultural organization<br>HI2. Market: Number of purchasing agents and Change in market prices | 3 dimensions<br>6 indicators<br>14 sub indicators<br>Source: Prepared by the authors based on Fogg, 2009 |

| Author                           | Method                                                                                                                                                                                                                                                                                                               | Level/Sector                                                                                     | Dimensions                                                                                                                                                | Indicators                                                                                                                                                                                                                                                                                                                                                                                                                                                                                                                                                          | Synthesis                                                                               |
|----------------------------------|----------------------------------------------------------------------------------------------------------------------------------------------------------------------------------------------------------------------------------------------------------------------------------------------------------------------|--------------------------------------------------------------------------------------------------|-----------------------------------------------------------------------------------------------------------------------------------------------------------|---------------------------------------------------------------------------------------------------------------------------------------------------------------------------------------------------------------------------------------------------------------------------------------------------------------------------------------------------------------------------------------------------------------------------------------------------------------------------------------------------------------------------------------------------------------------|-----------------------------------------------------------------------------------------|
| <b>Zanmassou Y. et al., 2020</b> | Five groups of indicators were created based on the five capitals, the data were normalized and two weighting schemes were used to combine the indicators in a composite index: equal weighting and expert judgment. In order to analyze the consistency of the uncertainty, a Monte Carlo simulation was performed. | Assessment of smallholder farmers' adaptive Capacity to climate change (Benin, Africa)           | Social capital<br>Human capital<br>Physical capital<br>Natural capitals<br>Financial capital                                                              | SC1. Member of a farmer organization<br>SC2. Number of relatives in the community<br>SC3. Participation in community activities<br>HC1. Year of schooling<br>HC2. Experience in agriculture<br>HC3. Number of crops grown<br>HC4. Visits of extension services<br>HC5. Received a training in agriculture                                                                                                                                                                                                                                                           | 6 dimensions                                                                            |
|                                  |                                                                                                                                                                                                                                                                                                                      |                                                                                                  |                                                                                                                                                           | FC1. Total area cropped<br>FC2. Distance house to farm<br>FC3. Distance house to market<br>FC4. Distance house to financial institution<br>FC5. Distance house to extension services office<br>NC1. Rainfall variability<br>NC2. Soil fertility<br>NC3. Land ownership<br>NC4. Experienced with natural hazard events on the farm.<br>FnC1. Off farm income<br>FnC2. Value of livestock<br>FnC3. Crop income<br>FnC4. Value of agricultural equipment<br>FnC5. Credit sources diversification                                                                       | 22 indicators<br>Source: Prepared by the authors based on 11 authors                    |
| <b>Matewos T., 2020</b>          | Mixed research: qualitative and quantitative data were collected. Cross-sectional household surveys, key informant interviews and focus group discussions were used to collect relevant data.                                                                                                                        | Local adaptive capacity to climate change in drought prone (districts of rural Sidama, Ethiopia) | Asset basis<br>Institutions and rights<br>Knowledge and information<br>Innovation<br>Flexible<br>Forward-looking<br>Decision Making (MFDM) and governance | AB1. Land holding size<br>AB2. Land use right<br>AB3. Livelihoods characteristics<br>AB4. Participation in on-farm livelihood activities<br>AB5. Participation off-farm livelihood activities<br>I1. Availability of formal and informal institutions<br>KI1. Literacy level<br>KI2. Access to weather forecast<br>KI3. Early warning<br>KI4. Market and government support information<br>In1. Agricultural inputs<br>In 2. Agricultural extension services<br>In 3. Small scale irrigation<br>G1. Types and characteristics of adaptive decisions made by farmers | 5 dimensions<br>14 indicators<br>Source: Prepared by authors based on Ludi et al., 2011 |
|                                  |                                                                                                                                                                                                                                                                                                                      |                                                                                                  |                                                                                                                                                           |                                                                                                                                                                                                                                                                                                                                                                                                                                                                                                                                                                     |                                                                                         |

| Author                                        | Method                                                                                                                                                                                                                                                                                                              | Level/Sector                                                                                    | Dimensions                                                                                   | Indicators                                             | Synthesis                                                                                                                                                   |
|-----------------------------------------------|---------------------------------------------------------------------------------------------------------------------------------------------------------------------------------------------------------------------------------------------------------------------------------------------------------------------|-------------------------------------------------------------------------------------------------|----------------------------------------------------------------------------------------------|--------------------------------------------------------|-------------------------------------------------------------------------------------------------------------------------------------------------------------|
| W. Chepkoech, et al., 2020                    | They conducted an expert online rating survey (n = 35). The Kruskal-Wallis H test and a <i>t</i> -test were used to test the independence of AC scores and the access to existing resources.                                                                                                                        | Adaptive capacity of smallholder African indigenous vegetable farmers to climate change (Kenya) | Natural capitals<br>Physical capital<br>Financial capital<br>Human capital<br>Social capital | CN1. Type of land ownership                            | 5 dimensions<br>20 indicators<br>Source: Prepared by authors based on Abdul-Razak y Kruse (2017), Defiesta y Rapera (2014), Eakin y Bojorquez Tapia (2008). |
|                                               |                                                                                                                                                                                                                                                                                                                     |                                                                                                 |                                                                                              | CN2. Size of land in acres                             |                                                                                                                                                             |
|                                               |                                                                                                                                                                                                                                                                                                                     |                                                                                                 |                                                                                              | CN3. Source of water                                   |                                                                                                                                                             |
|                                               |                                                                                                                                                                                                                                                                                                                     |                                                                                                 |                                                                                              | CN4. Decision over land management                     |                                                                                                                                                             |
|                                               |                                                                                                                                                                                                                                                                                                                     |                                                                                                 |                                                                                              | CF1. Type of irrigation                                |                                                                                                                                                             |
|                                               |                                                                                                                                                                                                                                                                                                                     |                                                                                                 |                                                                                              | CF2. Total number of assets                            |                                                                                                                                                             |
|                                               |                                                                                                                                                                                                                                                                                                                     |                                                                                                 |                                                                                              | CF3. Ownership of basic farm tools                     |                                                                                                                                                             |
|                                               |                                                                                                                                                                                                                                                                                                                     |                                                                                                 |                                                                                              | CF4. Ownership of farm machinery                       |                                                                                                                                                             |
|                                               |                                                                                                                                                                                                                                                                                                                     |                                                                                                 |                                                                                              | CFn1. Off-farm income                                  |                                                                                                                                                             |
|                                               |                                                                                                                                                                                                                                                                                                                     |                                                                                                 |                                                                                              | CFn2. Formal/informal credit                           |                                                                                                                                                             |
|                                               |                                                                                                                                                                                                                                                                                                                     |                                                                                                 |                                                                                              | CFn3. Number of income sources                         |                                                                                                                                                             |
|                                               |                                                                                                                                                                                                                                                                                                                     |                                                                                                 |                                                                                              | CFn4. Number of farm workers                           |                                                                                                                                                             |
|                                               |                                                                                                                                                                                                                                                                                                                     |                                                                                                 |                                                                                              | CH1. Education level                                   |                                                                                                                                                             |
|                                               |                                                                                                                                                                                                                                                                                                                     |                                                                                                 |                                                                                              | CH2. Number of years in farming                        |                                                                                                                                                             |
|                                               |                                                                                                                                                                                                                                                                                                                     |                                                                                                 |                                                                                              | CH3. Size of household                                 |                                                                                                                                                             |
|                                               |                                                                                                                                                                                                                                                                                                                     |                                                                                                 |                                                                                              | CH4. Number of adults                                  |                                                                                                                                                             |
|                                               |                                                                                                                                                                                                                                                                                                                     |                                                                                                 |                                                                                              | CS1. Frequency of extension                            |                                                                                                                                                             |
|                                               |                                                                                                                                                                                                                                                                                                                     |                                                                                                 |                                                                                              | CS2. Weather forecast information                      |                                                                                                                                                             |
| CS3. Group membership                         |                                                                                                                                                                                                                                                                                                                     |                                                                                                 |                                                                                              |                                                        |                                                                                                                                                             |
| CS4. Number of sources of weather information |                                                                                                                                                                                                                                                                                                                     |                                                                                                 |                                                                                              |                                                        |                                                                                                                                                             |
| Abbas Khan N. et. al., 2020                   | Data were acquired through a farm-level survey, and the variables obtained were grouped into three clusters. Principal component analysis was applied as an exploratory analysis. The data were normalized and weights were assigned to each variable according to expert judgment and the AC Index was calculated. | Mapping rice farmers’ adaptive capacity of Agricultura (productors de arroz)                    | Socioeconom ic capacity<br>Agricultural capacity<br>Institutional capacity                   | CS1. Education: farmers' average years of schooling    | 3 dimensions<br>11 indicators<br>Source: Prepared by the authors based on Sendhil R. et al., 2018                                                           |
|                                               |                                                                                                                                                                                                                                                                                                                     |                                                                                                 |                                                                                              | CS2. Farm Income                                       |                                                                                                                                                             |
|                                               |                                                                                                                                                                                                                                                                                                                     |                                                                                                 |                                                                                              | CS3. Off-farm income sources                           |                                                                                                                                                             |
|                                               |                                                                                                                                                                                                                                                                                                                     |                                                                                                 |                                                                                              | AC1. Landholding                                       |                                                                                                                                                             |
|                                               |                                                                                                                                                                                                                                                                                                                     |                                                                                                 |                                                                                              | CA2. Farming experience                                |                                                                                                                                                             |
|                                               |                                                                                                                                                                                                                                                                                                                     |                                                                                                 |                                                                                              | CA3. Farm labor                                        |                                                                                                                                                             |
|                                               |                                                                                                                                                                                                                                                                                                                     |                                                                                                 |                                                                                              | AC4. Farmers who own livestock                         |                                                                                                                                                             |
|                                               |                                                                                                                                                                                                                                                                                                                     |                                                                                                 |                                                                                              | CA5. Farmers who adopted climate adaptation strategies |                                                                                                                                                             |
|                                               |                                                                                                                                                                                                                                                                                                                     |                                                                                                 |                                                                                              | CI1. Credit access                                     |                                                                                                                                                             |
|                                               |                                                                                                                                                                                                                                                                                                                     |                                                                                                 |                                                                                              | CI2. Advisory received                                 |                                                                                                                                                             |
|                                               |                                                                                                                                                                                                                                                                                                                     |                                                                                                 |                                                                                              | CI3. Farmers with access to climate information        |                                                                                                                                                             |

| Author              | Method                                                                                                                                                                                                                                                           | Level/Sector                                                                                        | Dimensions                                                                                                                                     | Indicators                                                                                                                                                                                                                                                                                                                                                                                                                                                                                                                                                                                                                                                                                | Synthesis                                                        |
|---------------------|------------------------------------------------------------------------------------------------------------------------------------------------------------------------------------------------------------------------------------------------------------------|-----------------------------------------------------------------------------------------------------|------------------------------------------------------------------------------------------------------------------------------------------------|-------------------------------------------------------------------------------------------------------------------------------------------------------------------------------------------------------------------------------------------------------------------------------------------------------------------------------------------------------------------------------------------------------------------------------------------------------------------------------------------------------------------------------------------------------------------------------------------------------------------------------------------------------------------------------------------|------------------------------------------------------------------|
| <b>Choden, 2020</b> | Households selected through simple random sampling were surveyed on perception of changes in climate and on available capital assets. A factor analysis was performed using Varimax with Kaiser normalization rotation and a Principal Component Analysis (PCA). | Assessment of adaptive capacity to climate change at household and village-levels. (Nikachu, Bután) | Human capital<br>Natural Capital<br>Capital (resources)<br>Natural Capital (Access)<br>Financial capital<br>Physical capital<br>Social capital | HC1. Educational level of the head of the household<br>HC2. Walking time to the nearest Basic Health Unit<br>HC3. Training on climate change adaptation<br>NC1. Land holding per household<br>NC2. Forest cover<br>NC3. Meadows<br>NC4. Shrubs<br>NCA1. Protected area/village<br>NCA2. Community forest/village<br>FC1. Proportion of climate-sensitive resources income to total income<br>FC2. Proportion of off-farm income to total income<br>FC3. Total income<br>FC4. Livelihood Diversity Index<br>PhC1. House type<br>Ph2. Walking time to the nearest market<br>PhC3. Road type<br>SC1. Membership in social organizations by household<br>SC2. Gender<br>SC3. Household number | 6 dimensions<br>19 indicators<br>Source: Prepared by the authors |
|                     |                                                                                                                                                                                                                                                                  |                                                                                                     |                                                                                                                                                |                                                                                                                                                                                                                                                                                                                                                                                                                                                                                                                                                                                                                                                                                           |                                                                  |
| <b>Putri, 2020</b>  | Through interviews with key informants selected through purposive sampling and an AC index was created.                                                                                                                                                          | Community adaptive capacity (Semarang, Indonesia)                                                   | Economics<br>Social Information and Technology Infrastructure<br>Innovation                                                                    | E1. Household Economics Condition<br>E2. Asset ownership<br>S1. Participation in Community<br>S2. Access to aid<br>IT1. Information about climate change<br>I1. Access to infrastructure provided<br>In1. Willingness to adapt                                                                                                                                                                                                                                                                                                                                                                                                                                                            | 5 dimensions<br>7 indicators<br>Source: Prepared by the authors  |

| Author           | Method                                                                                                                                                          | Level/Sector                                                        | Dimensions                                           | Indicators                                                                            | Synthesis                                                                        |
|------------------|-----------------------------------------------------------------------------------------------------------------------------------------------------------------|---------------------------------------------------------------------|------------------------------------------------------|---------------------------------------------------------------------------------------|----------------------------------------------------------------------------------|
| Parveen,<br>2022 | A tree of decision criteria was built, the criteria were standardized on a 0-1 scale range and finally a climate change vulnerability assessment was conducted. | Climate change vulnerability assessment: a case study in the Indian | Basic facilities<br>Economic aspect<br>Social aspect | BF1. Accessibility to clean drinking water connection                                 | 3 dimensions<br>10 indicators<br>Source: Prepared by authors based on 10 authors |
|                  |                                                                                                                                                                 |                                                                     |                                                      | BF2. Accessibility to efficient cooking fuel                                          |                                                                                  |
|                  |                                                                                                                                                                 |                                                                     |                                                      | BF3. Accessibility to public transport                                                |                                                                                  |
|                  |                                                                                                                                                                 |                                                                     |                                                      | EA1. Percentage of households who own their homes                                     |                                                                                  |
|                  |                                                                                                                                                                 |                                                                     |                                                      | EA2. Percentage of households owning any kind of asset                                |                                                                                  |
|                  |                                                                                                                                                                 |                                                                     |                                                      | EA3. Local government or communities-based organization                               |                                                                                  |
|                  |                                                                                                                                                                 |                                                                     |                                                      | EA4. Awareness and knowledge of different policies and scheme run by local government |                                                                                  |
|                  |                                                                                                                                                                 |                                                                     |                                                      | SA1. Percentage of people who are literate                                            |                                                                                  |
|                  |                                                                                                                                                                 |                                                                     |                                                      | SA2. Social welfare programmes                                                        |                                                                                  |
|                  |                                                                                                                                                                 |                                                                     |                                                      | SA3. Accessibility of media                                                           |                                                                                  |

Table S3. Definition of terms used in the article.

|                            |                                                                                                                                                                                                                         |
|----------------------------|-------------------------------------------------------------------------------------------------------------------------------------------------------------------------------------------------------------------------|
| <b>Dimension</b>           | refers to the group of aspects or components that represent a type of potentialities or similar resources, for example: economic, social, human, natural, etc. Some authors describe it as themes, pillars, or capitals |
| <b>Specific dimension</b>  | refers to each aspect of the adaptive capacity that is considered relevant and that contributes to the measurement of each dimension, this can be estimated through one or more indicators, depending on its complexity |
| <b>Indicator</b>           | refers to a function between one or more variables, which allows measuring a specific attribute or aspect of a system or situation                                                                                      |
| <b>Composite indicator</b> | combination of a set of indicators that allows a complex component or a multidimensional concept to be measured, summarizing it in a simple index (one-dimensional)                                                     |
| <b>Adaptive capacity</b>   | The ability of systems, institutions, humans, and other organisms to adjust to potential damage, to take advantage of opportunities, or to respond to consequences (IPCC, 2022)                                         |
| <b>Adaptation</b>          | refers to the process of adjustment to actual or expected climate and its effects, in order to moderate harm or exploit beneficial opportunities (IPCC, 2022)                                                           |
